# Supplementary material
Source: Springer Nature journal article supplement (https://www.springermedizin.de/resource/supplementary/40248_2014_166_MOESM2_ESM.pdf/9686248)

# Dysphagia evaluation in Tracheostomized patients

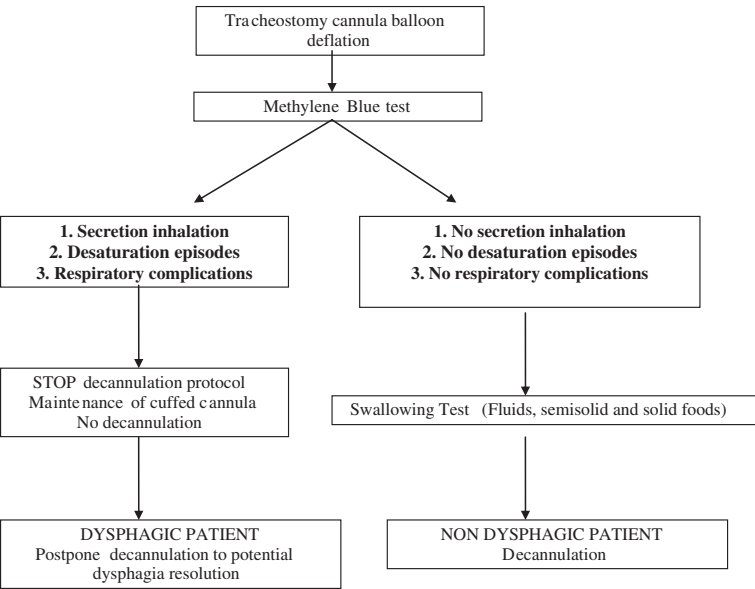

Supplement: MOESM2 [file 9686248]
